# Supplementary material for: (C2H10N2)[Zn2(HPO4)2Cl2]: substitution-activated new short-wave ultraviolet phosphate with pivotal dual-property enhancement
Source: Royal Society of Chemistry journal article supplement (doi:10.1039/d4tc03504f), 2024-01-01

## Supporting Information

### **(C<sub>2</sub>H<sub>10</sub>N<sub>2</sub>)[Zn<sub>2</sub>(HPO<sub>4</sub>)<sub>2</sub>Cl<sub>2</sub>]: Substitution-Activated New Short-Wave Ultraviolet Phosphate with Pivotal Dual-Property Enhancement**

Zhi Fang<sup>a</sup>, Yu-Ming Pan<sup>b</sup>, Pei Han<sup>b</sup>, Bing-Ping Yang<sup>c</sup> and Mei-Hong Duan<sup>\*b, d</sup>

<sup>a</sup>. Chemical Synthesis and Pollution Control Key Laboratory of Sichuan Province, College of Chemistry and Chemical Engineering, China West Normal University, Nanchong 637002, China

<sup>b</sup>. College of Physics and Astronomy, China West Normal University, Nanchong 637002, China

<sup>c</sup>. State Key Laboratory of Structural Chemistry, Fujian Institute of Research on the Structure of Matter, Chinese Academy of Sciences, Fuzhou, Fujian 350002, P. R. China

<sup>d</sup>. Key Laboratory of Functional Crystals and Laser Technology, TIPC, CAS, Beijing 100190, China

#### CONTENTS

|                                                                                                                                                                                                                                                   |     |
|---------------------------------------------------------------------------------------------------------------------------------------------------------------------------------------------------------------------------------------------------|-----|
| <b>Table S1.</b> Fractional Atomic Coordinates ( $\times 10^4$ ) and Equivalent Isotropic Displacement Parameters ( $\text{\AA}^2 \times 10^3$ ) for EZPOC. $U_{\text{eq}}$ is defined as 1/3 of the trace of the orthogonalised $U_{ij}$ tensor. | S2  |
| <b>Table S2.</b> Anisotropic displacement parameters, ( $\text{\AA}^2 \times 10^3$ ), for EZPOC.                                                                                                                                                  | S3  |
| <b>Table S3.</b> Selected bond lengths for EZPOC.                                                                                                                                                                                                 | S4  |
| <b>Table S4.</b> Selected bond angles for EZPOC.                                                                                                                                                                                                  | S5  |
| <b>Table S5.</b> Hydrogen Atom Coordinates ( $\text{\AA} \times 10^4$ ) and Isotropic displacement Parameters ( $\text{\AA}^2 \times 10^3$ ) for EZPOC.                                                                                           | S6  |
| <b>Figure S1.</b> Structures of EZPOC (Top) and pseudo EZPOC layer (Bottom).                                                                                                                                                                      | S7  |
| <b>Figure S2.</b> Measured and simulated PXRD patterns for EZPOC.                                                                                                                                                                                 | S8  |
| <b>Figure S3.</b> The $\text{Zn}_2\text{Cl}_2(\text{HPO}_4)_2\text{O}_2$ loop in EZPOC and the $\text{Zn}_2\text{O}_2(\text{PO}_4)_2\text{O}_2$ loop in KZPO.                                                                                     | S9  |
| <b>Figure S4.</b> Band Structure of EZPOC.                                                                                                                                                                                                        | S10 |
| <b>Figure S5.</b> Band Structure of KZPO.                                                                                                                                                                                                         | S10 |
| <b>Figure S6.</b> Calculated refractive index and birefringence of KZPO.                                                                                                                                                                          | S11 |
| <b>Figure S7.</b> Comparison of birefringence between EZPOC and some commercial SUV phosphates, as well as some halogenated phosphates.                                                                                                           | S11 |

**Table S1.** Fractional Atomic Coordinates ( $\times 10^4$ ) and Equivalent Isotropic Displacement Parameters ( $\text{\AA}^2 \times 10^3$ ) for EZPOC.  $U_{\text{eq}}$  is defined as 1/3 of the trace of the orthogonalised  $U_{ij}$  tensor.

| Atom | x/a        | y/b       | z/c       | $U_{\text{eq}} [\text{\AA}^2]$ |
|------|------------|-----------|-----------|--------------------------------|
| Zn1  | 3484.6(6)  | 3033.7(4) | 3721.5(4) | 14.90(9)                       |
| Cl1  | 5997.5(14) | 1655.2(9) | 1296.2(8) | 22.57(15)                      |
| P1   | 2147.6(13) | 7346.6(8) | 4178.0(8) | 12.73(13)                      |
| O3   | 2296(4)    | 5614(2)   | 3349(2)   | 21.6(4)                        |
| O4   | 4943(4)    | 7383(3)   | 4411(2)   | 21.7(4)                        |
| O1   | 1347(4)    | 8826(2)   | 2902(2)   | 22.0(4)                        |
| O2   | -127(4)    | 7801(2)   | 5781(2)   | 18.0(4)                        |
| N1   | 8337(5)    | 7281(3)   | 1102(3)   | 23.3(5)                        |
| C1   | 8843(6)    | 5326(4)   | 763(3)    | 21.9(6)                        |
| H1   | 960.93     | 9841.62   | 3314.4    | 33                             |
| H1A  | 7532.43    | 7934.09   | 372.73    | 28                             |
| H1B  | 9958.11    | 7490.16   | 1040.66   | 28                             |
| H1C  | 7214.21    | 7592.37   | 2098.41   | 28                             |
| H1D  | 7142.15    | 5132.12   | 634.91    | 26                             |
| H1E  | 9347.92    | 4632.73   | 1676.15   | 26                             |

**Table S2.** Anisotropic displacement parameters, ( $\text{\AA}^2 \times 10^3$ ), for EZPOC.

| Atom | U11       | U22       | U33       | U12       | U13       | U23       |
|------|-----------|-----------|-----------|-----------|-----------|-----------|
| Zn1  | 14.23(15) | 14.26(15) | 16.43(16) | -2.13(10) | -3.03(11) | -4.95(11) |
| Cl1  | 24.6(3)   | 20.5(3)   | 18.7(3)   | -5.4(2)   | 0.4(2)    | -5.1(3)   |
| P1   | 12.4(3)   | 11.5(3)   | 14.5(3)   | -1.1(2)   | -3.7(2)   | -3.4(2)   |
| O3   | 28(1)     | 12.2(8)   | 25.5(10)  | -2.8(7)   | -9.1(8)   | -5.0(8)   |
| O4   | 14.0(8)   | 34.5(11)  | 19.0(9)   | 0.6(8)    | -4.9(7)   | -10.2(8)  |
| O1   | 32.1(11)  | 15.8(9)   | 21.1(10)  | 0.9(7)    | -12.1(8)  | -7.3(8)   |
| O2   | 15.2(8)   | 20.1(9)   | 19.2(9)   | -4.2(7)   | -0.6(7)   | -8.6(7)   |
| N1   | 22.7(12)  | 20.4(11)  | 25.7(12)  | -4.3(9)   | -4.1(10)  | -5.8(9)   |
| C1   | 23.5(14)  | 18.9(12)  | 22.8(14)  | -1.3(10)  | -4.3(11)  | -6.5(11)  |

**Table S3.** Selected bond lengths for EZPOC.

| Atom 1,2            | d 1,2 [Å]  |
|---------------------|------------|
| Zn1-Cl1             | 2.2484(7)  |
| Zn1-O3              | 1.9382(18) |
| Zn1-O4 <sup>1</sup> | 1.9370(19) |
| Zn1-O2 <sup>2</sup> | 1.9705(17) |
| P1-O3               | 1.5123(19) |
| P1-O4               | 1.5196(19) |
| P1-O1               | 1.5774(19) |
| P1-O2               | 1.5270(18) |
| N1-C1               | 1.480(3)   |
| C1-C1 <sup>3</sup>  | 1.505(5)   |

<sup>1</sup>1-X,1-Y,1-Z; <sup>2</sup>1-X,1-Y,1-Z; <sup>3</sup>2-X,1-Y,-Z

**Table S4.** Selected bond angles for EZPOC.

| <b>Atom 1,2,3</b>                    | <b>Angle 1,2 ,3[°]</b> |
|--------------------------------------|------------------------|
| O3-Zn1-Cl1                           | 106.62(6)              |
| O3-Zn1-O2 <sup>1</sup>               | 107.37(8)              |
| O4 <sup>2</sup> -Zn1-Cl1             | 120.32(6)              |
| O4 <sup>2</sup> -Zn1-O3              | 109.81(8)              |
| O4 <sup>2</sup> -Zn1-O2 <sup>1</sup> | 108.42(8)              |
| O2 <sup>1</sup> -Zn1Cl1              | 103.54(5)              |
| O3-P1-O4                             | 113.50(11)             |
| O3-P1-O1                             | 102.59(11)             |
| O3-P1-O2                             | 112.72(11)             |
| O4-P1-O1                             | 107.24(11)             |
| O4-P1-O2                             | 110.97(11)             |
| O2-P1-O1                             | 109.28(11)             |
| P1-O3-Zn1                            | 136.73(13)             |
| P1-O4-Zn1 <sup>2</sup>               | 132.46(11)             |
| P1-O2-Zn1 <sup>1</sup>               | 123.68(11)             |
| N1-C1-C1 <sup>3</sup>                | 110.7(3)               |

<sup>1</sup>-X,1-Y,1-Z; <sup>2</sup>1-X,1-Y,1-Z; <sup>3</sup>2-X,1-Y,-Z

**Table S5.** Hydrogen Atom Coordinates ( $\text{\AA}\times 10^4$ ) and Isotropic displacement Parameters ( $\text{\AA}^2\times 10^3$ ) for EZPOC.

| Atom | x/a     | y/b     | z/c     | Ueq [ $\text{\AA}^2$ ] |
|------|---------|---------|---------|------------------------|
| H1   | 960.93  | 9841.62 | 3314.4  | 33                     |
| H1A  | 7532.43 | 7934.09 | 372.73  | 28                     |
| H1B  | 9958.11 | 7490.16 | 1040.66 | 28                     |
| H1C  | 7214.21 | 7592.37 | 2098.41 | 28                     |
| H1D  | 7142.15 | 5132.12 | 634.91  | 26                     |
| H1E  | 9347.92 | 4632.73 | 1676.15 | 26                     |

Figure S1. Structures of EZPOC (Top) and pseudo EZPOC layer (Bottom).

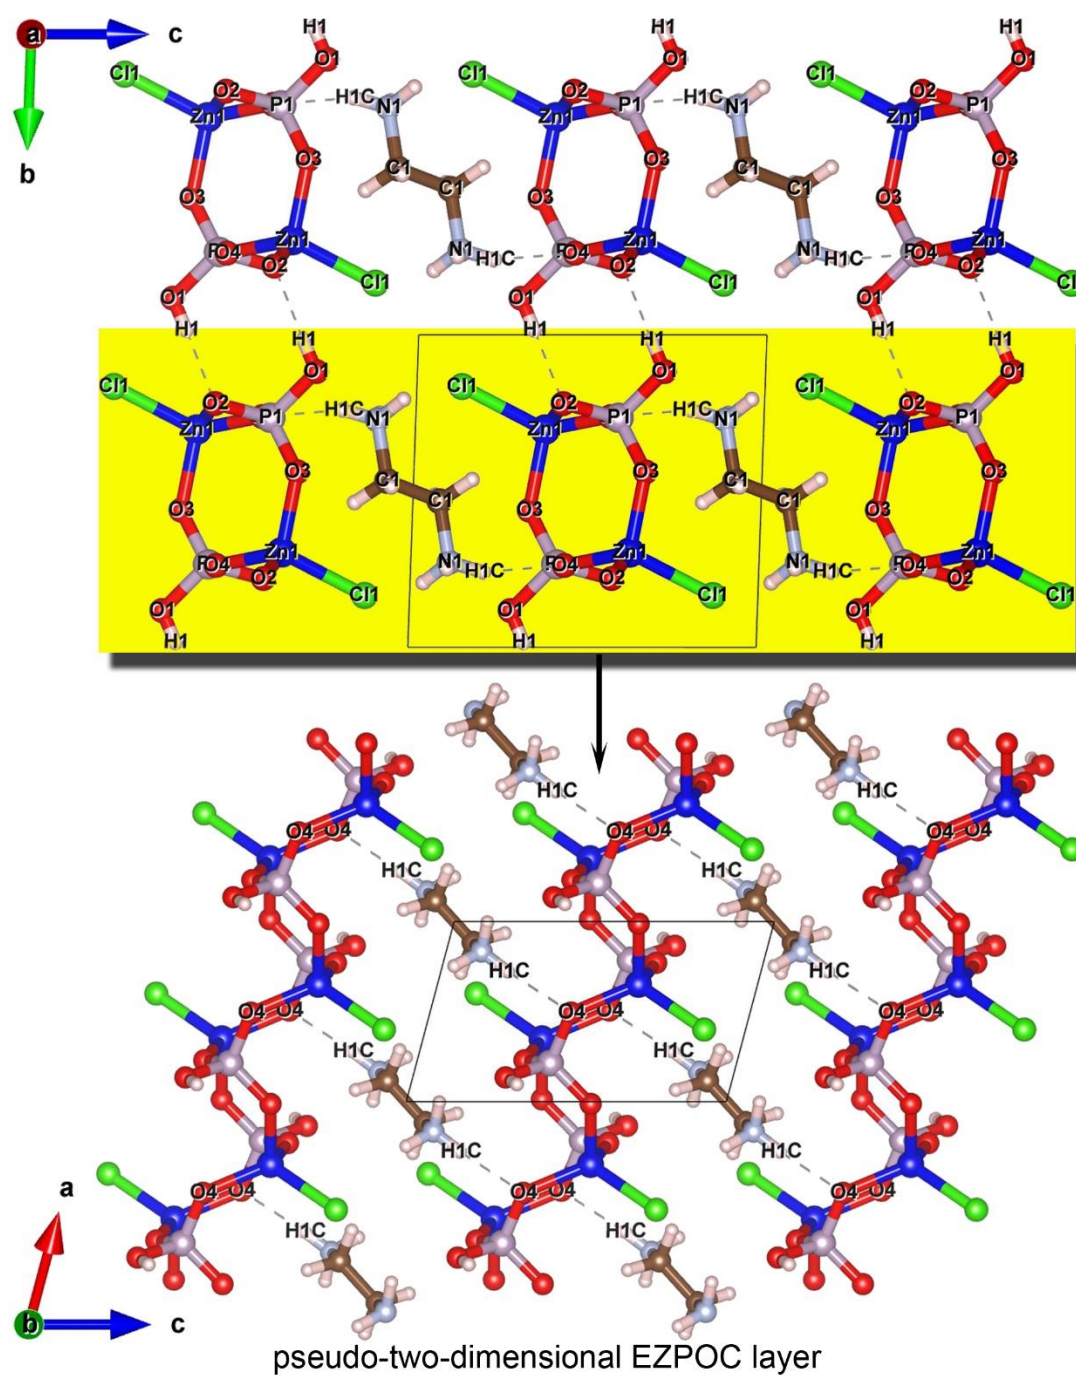

**Figure S2.** Measured and simulated PXRD patterns for EZPOC.

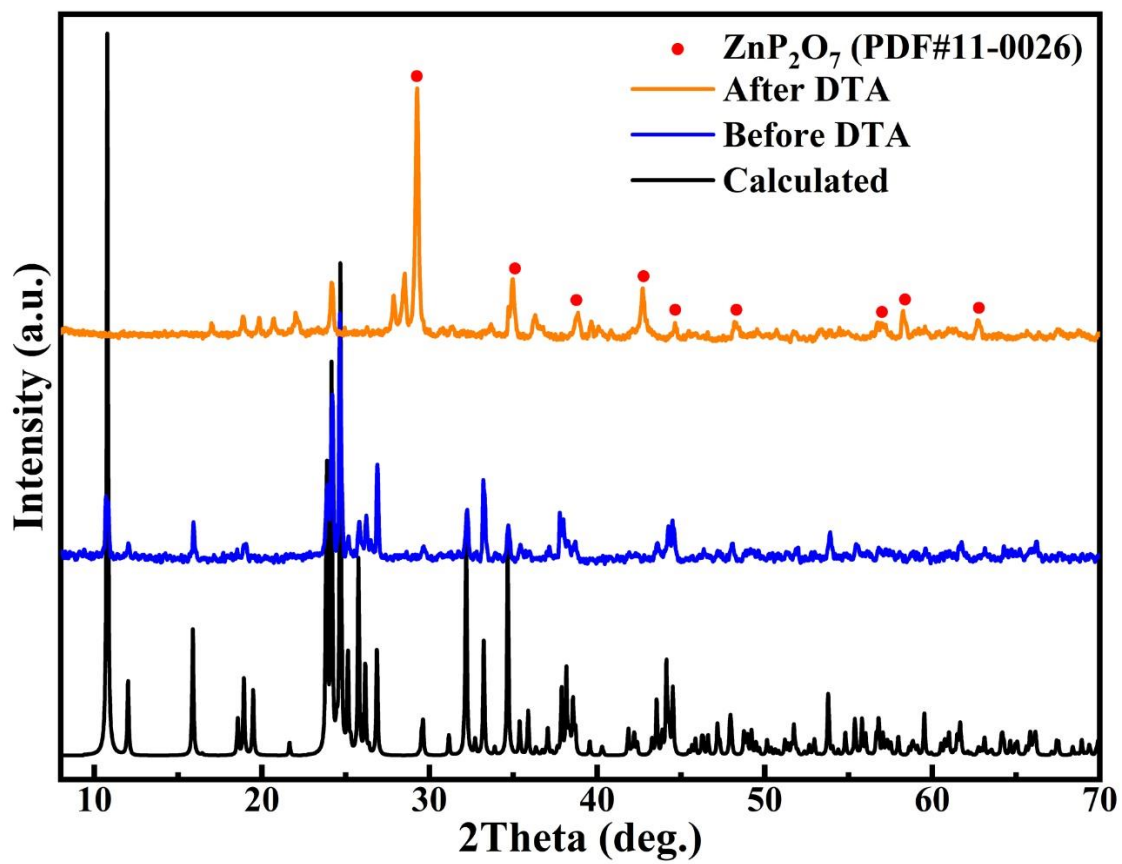



**Figure S3.** The  $\text{Zn}_2\text{Cl}_2(\text{HPO}_4)_2\text{O}_2$  loop in EZPOC and the  $\text{Zn}_2\text{O}_2(\text{PO}_4)_2\text{O}_2$  loop in KZPO.

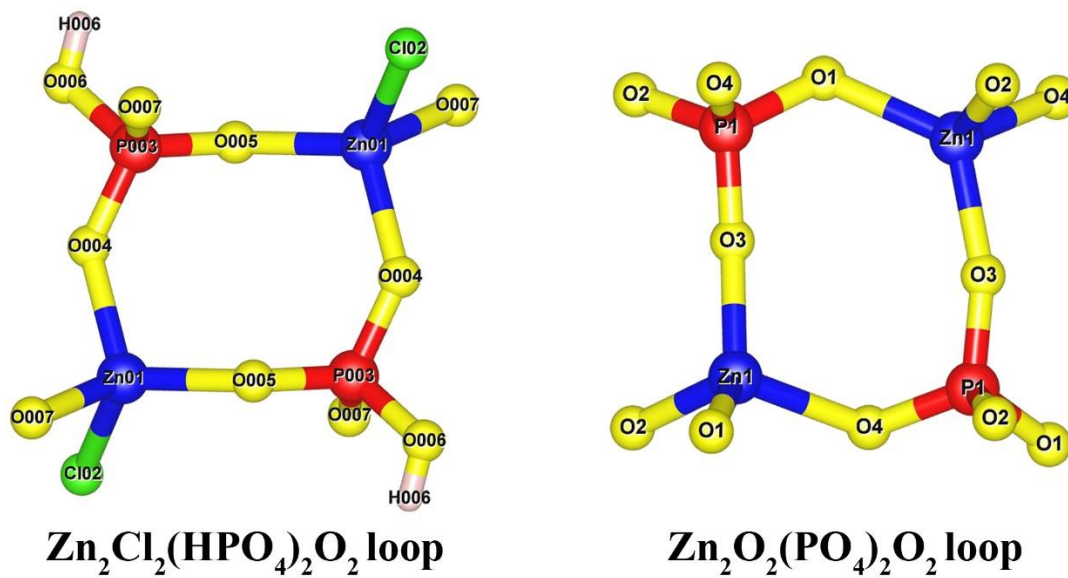

Figure S4. Band Structure of EZPOC.

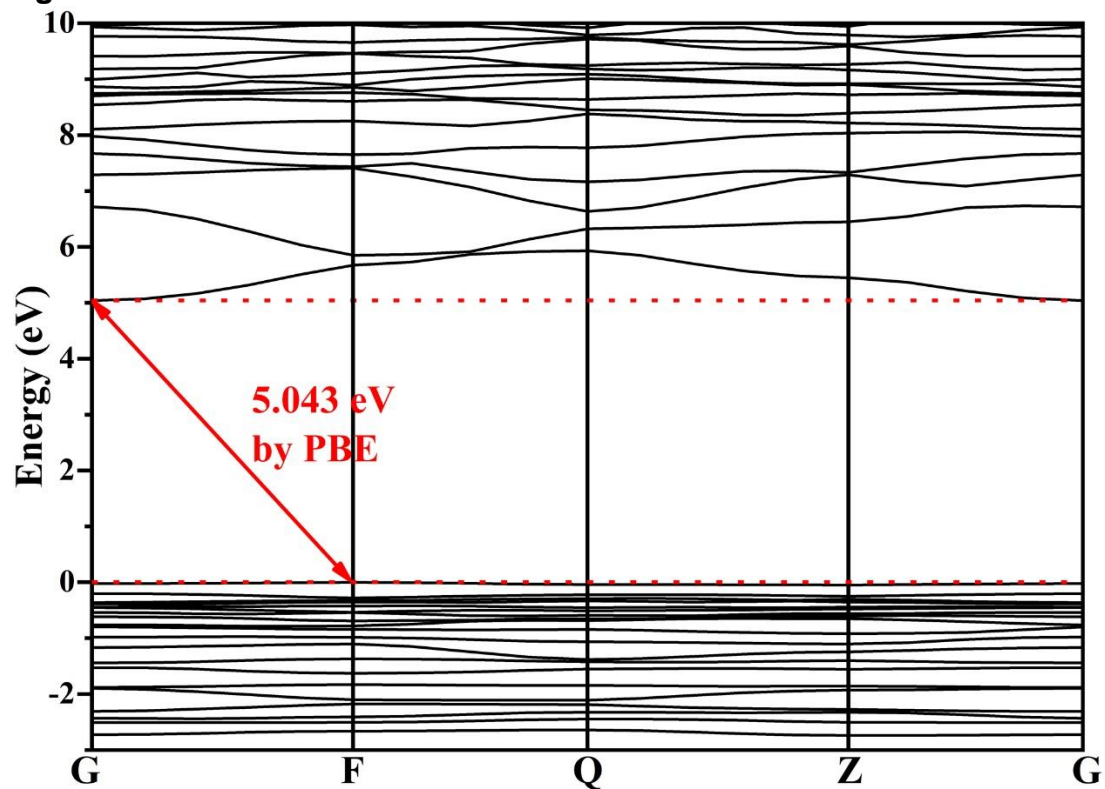

Figure S5. Band Structure of KZPO.

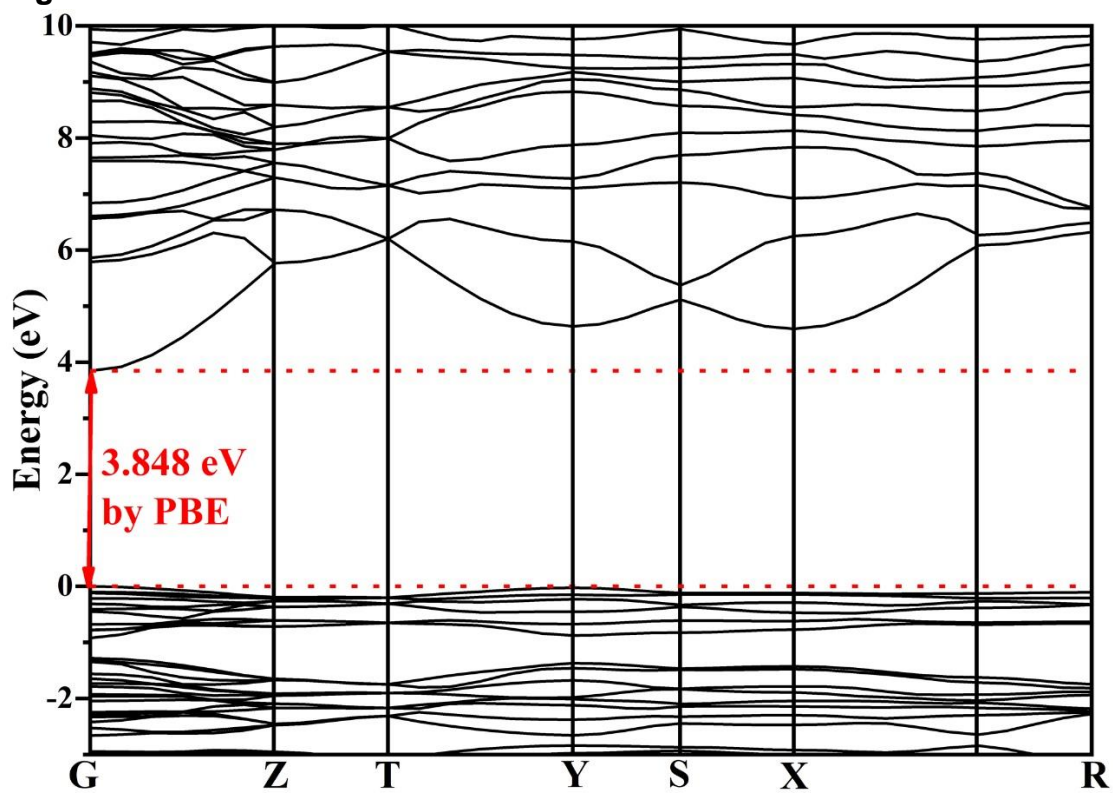

**Figure S6.** Calculated refractive index and birefringence for KZPO.

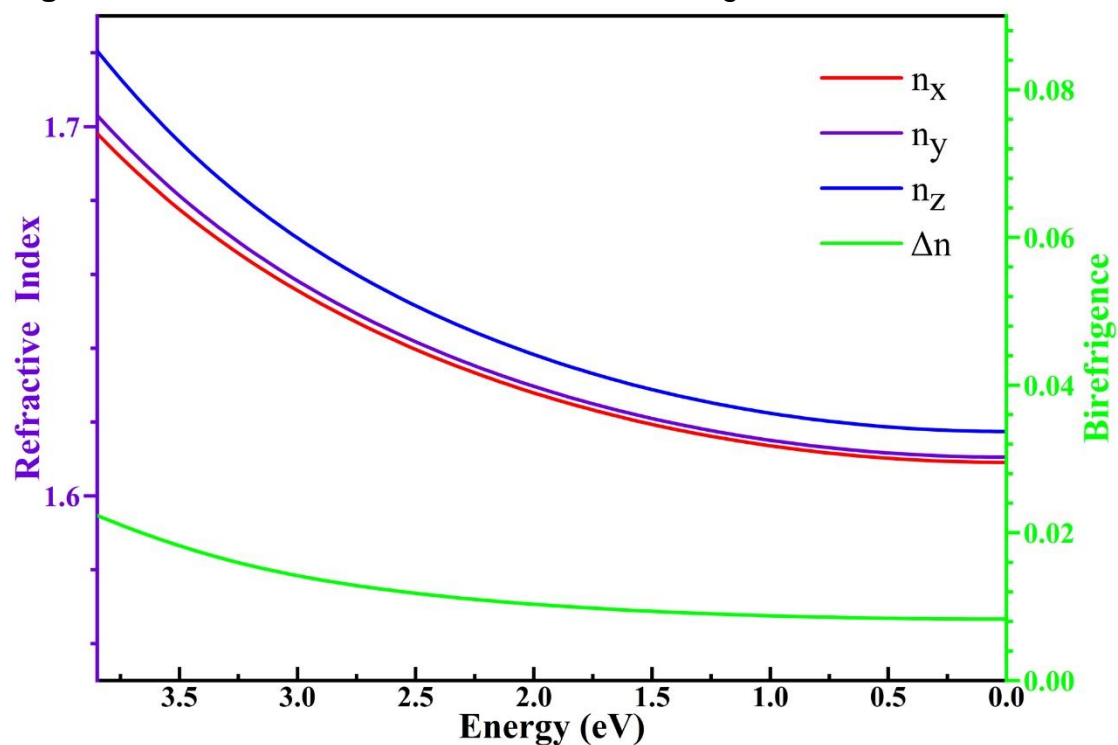

**Figure S7.** Comparison of birefringence between EZPOC and some commercial SUV phosphates, as well as some halogenated phosphates.

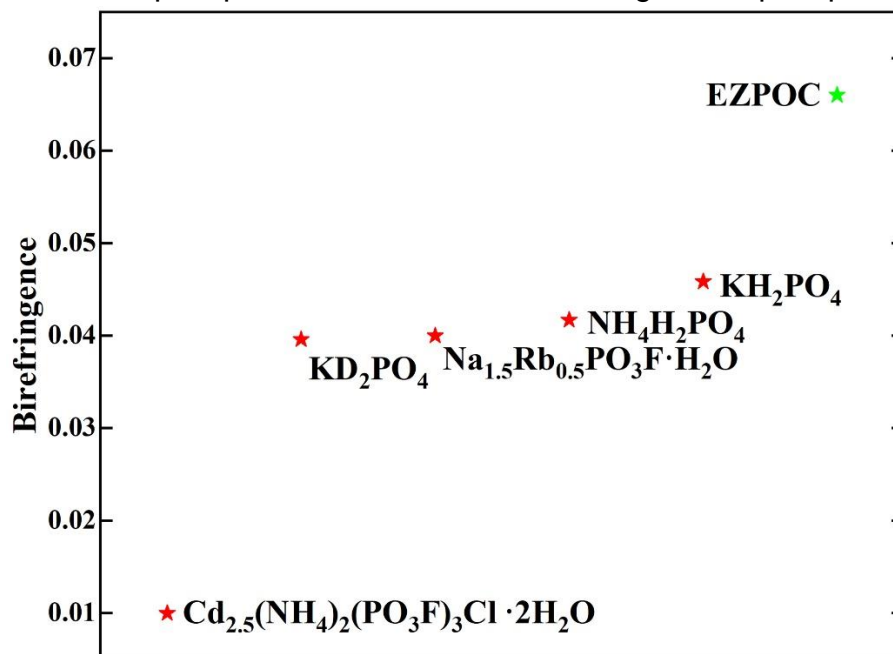

Supplement: d4tc03504f1.pdf [file d4tc03504f1.pdf]
